# Supplementary material for: Improved Survival With Higher-risk Donor Grafts in Liver Transplant With Acute-on-chronic Liver Failure
Source: PubMed Central journal article supplement — Transplant Direct. 2022 Jan 26;8(2):e1283. doi: 10.1097/TXD.0000000000001283 (PMC8806387; doi:10.1097/txd.0000000000001283), 2022-01-26
Supplement: txd-8-e1283-s001.pdf [file txd-8-e1283-s001.pdf]

**SDC, Figure 1.** Adjusted hazards of one-year patient death in each DRI category in ACLF-1 and 2 (Ref:  $0 < \text{DRI} \leq 1.2$ )

**A. Overall (2002-2019)**

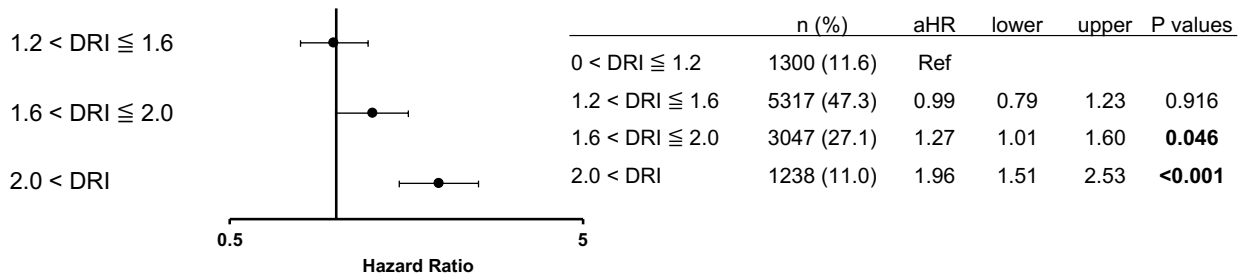

**B. Era 1 (2002-2007)**

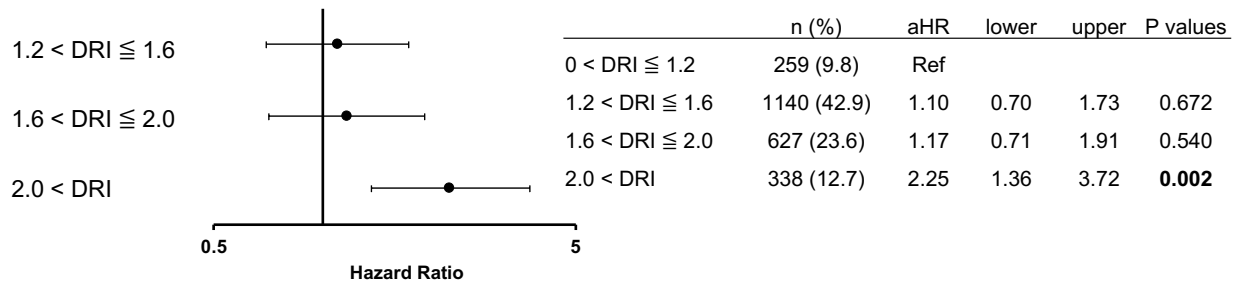

**C. Era 2 (2008-2013)**

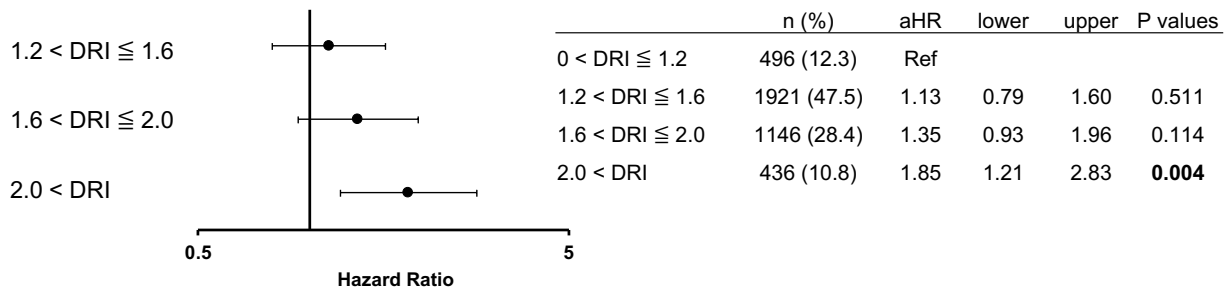

**D. Era 3 (2014-2019)**

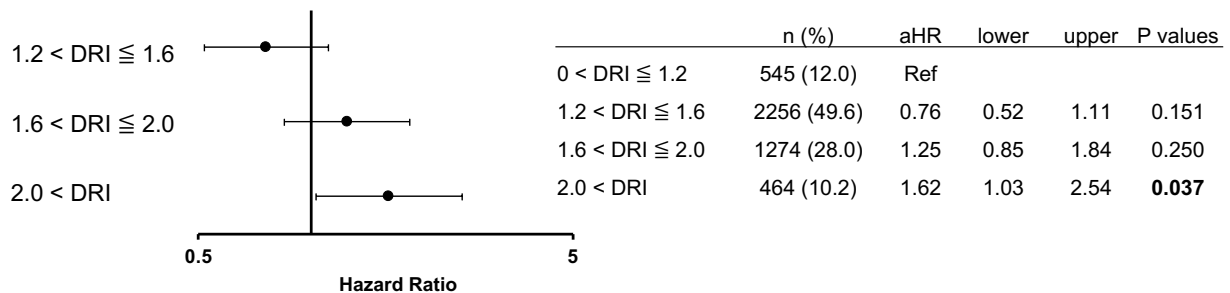

**SDC, Figure 2.** Adjusted hazards of one-year patient death in each DRI category in ACLF-3 (Ref:  $0 < \text{DRI} \leq 1.2$ )

**A. Overall (2002-2019)**

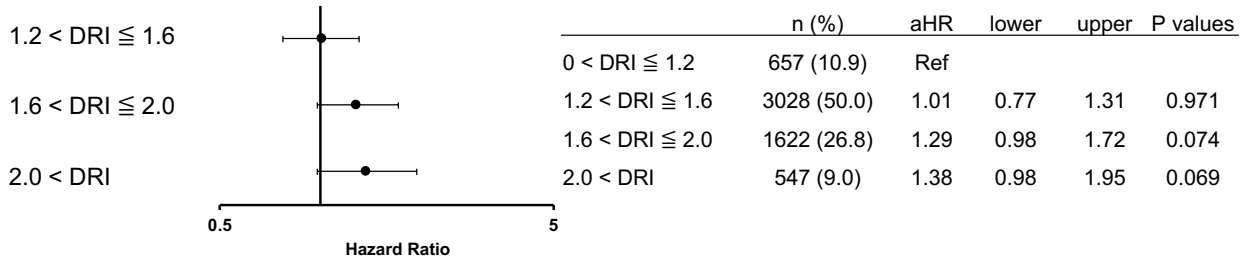

**B. Era 1 (2002-2007)**

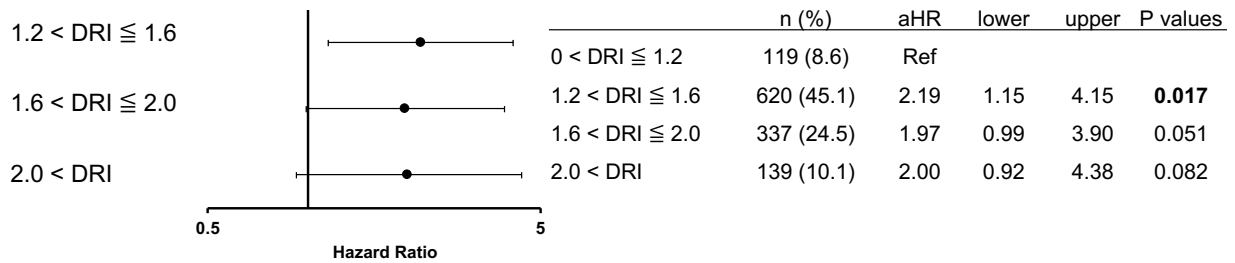

**C. Era 2 (2008-2013)**

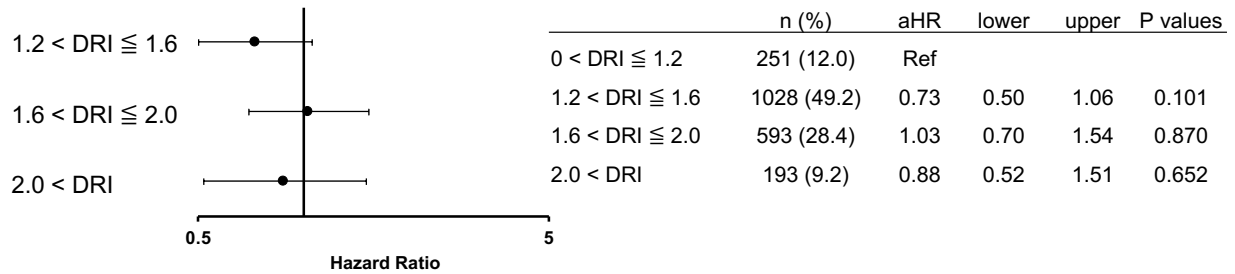

**D. Era 3 (2014-2019)**

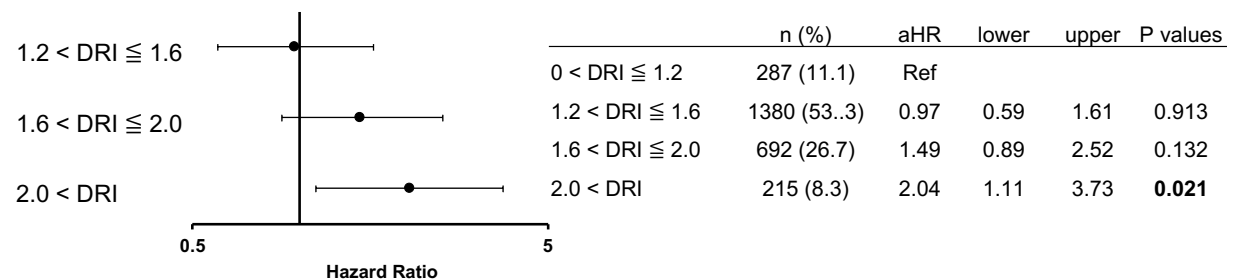

**SDC, Table 1.** One-year patient survival rates in each Era based on DRI category

|                            | Era 1<br>(2002-2007) | Era 2<br>(2008-2013) | Era 3<br>(2014-2019) |
|----------------------------|----------------------|----------------------|----------------------|
| <b><i>Overall ACLF</i></b> |                      |                      |                      |
| Overall                    | 80.4                 | 85.2                 | 89.4                 |
| 0 < DRI ≤ 1.2              | 85.6                 | 86.2                 | 90.7                 |
| 1.2 < DRI ≤ 1.6            | 82.0                 | 86.5                 | 91.1                 |
| 1.6 < DRI ≤ 2.0            | 81.2                 | 83.3                 | 87.8                 |
| 2.0 < DRI                  | 74.4                 | 82.3                 | 82.9                 |
| <b><i>ACLF-1 and 2</i></b> |                      |                      |                      |
| Overall                    | 82.4                 | 87.3                 | 90.1                 |
| 0 < DRI ≤ 1.2              | 87.1                 | 88.4                 | 90.5                 |
| 1.2 < DRI ≤ 1.6            | 84.9                 | 88.5                 | 92.2                 |
| 1.6 < DRI ≤ 2.0            | 84.1                 | 86.1                 | 88.3                 |
| 2.0 < DRI                  | 73.0                 | 83.4                 | 84.7                 |
| <b><i>ACLF-3</i></b>       |                      |                      |                      |
| Overall                    | 76.5                 | 81.1                 | 88.1                 |
| 0 < DRI ≤ 1.2              | 82.1                 | 81.8                 | 91.2                 |
| 1.2 < DRI ≤ 1.6            | 76.4                 | 82.8                 | 89.4                 |
| 1.6 < DRI ≤ 2.0            | 75.9                 | 78.1                 | 86.9                 |
| 2.0 < DRI                  | 78.0                 | 79.8                 | 78.8                 |
| <b><i>Non-ACLF</i></b>     |                      |                      |                      |
| Overall                    | 89.5                 | 91.7                 | 93.6                 |
| 0 < DRI ≤ 1.2              | 93.6                 | 93.5                 | 94.5                 |
| 1.2 < DRI ≤ 1.6            | 91.0                 | 92.6                 | 94.3                 |
| 1.6 < DRI ≤ 2.0            | 88.9                 | 90.9                 | 93.1                 |
| 2.0 < DRI                  | 86.7                 | 89.9                 | 92.1                 |

ACLF: Acute-on-chronic liver failure, aHR: Adjusted hazard ratio, CI: Confidence interval, DRI, donor risk index

**SDC, Table 2.** Adjusted hazards of one-year patient death in each DRI category according to eras in HCV patients (ref: Era 1 [2002-2007])

|                               | Era 2 (2008-2013) |                  | Era 3 (2014-2019) |                  |
|-------------------------------|-------------------|------------------|-------------------|------------------|
|                               | aHR (95% CI)      | P                | aHR (95% CI)      | P                |
| <b>Overall ACLF (n=4,097)</b> |                   |                  |                   |                  |
| Overall                       | 0.72 (0.61-0.86)  | <b>&lt;0.001</b> | 0.48 (0.38-0.60)  | <b>&lt;0.001</b> |
| 0 < DRI ≤ 1.2                 | 1.15 (0.59-2.25)  | 0.674            | 1.06 (0.49-2.27)  | 0.889            |
| 1.2 < DRI ≤ 1.6               | 0.64 (0.49-0.82)  | <b>0.001</b>     | 0.36 (0.25-0.52)  | <b>&lt;0.001</b> |
| 1.6 < DRI ≤ 2.0               | 1.17 (0.81-1.68)  | 0.397            | 0.76 (0.48-1.19)  | 0.226            |
| 2.0 < DRI                     | 0.82 (0.50-1.34)  | 0.426            | 0.71 (0.38-1.30)  | 0.262            |
| <b>ACLF-1 and 2 (n=2,636)</b> |                   |                  |                   |                  |
| Overall                       | 0.69 (0.56-0.86)  | <b>0.001</b>     | 0.52 (0.39-0.70)  | <b>&lt;0.001</b> |
| 0 < DRI ≤ 1.2                 | 0.81 (0.34-1.94)  | 0.634            | 1.13 (0.44-2.89)  | 0.805            |
| 1.2 < DRI ≤ 1.6               | 0.75 (0.53-1.07)  | 0.111            | 0.52 (0.33-0.83)  | <b>0.006</b>     |
| 1.6 < DRI ≤ 2.0               | 1.18 (0.72-1.95)  | 0.509            | 0.86 (0.47-1.54)  | 0.601            |
| 2.0 < DRI                     | 0.92 (0.52-1.62)  | 0.764            | 0.57 (0.25-1.27)  | 0.169            |
| <b>ACLF-3 (n=1,461)</b>       |                   |                  |                   |                  |
| Overall                       | 0.76 (0.58-1.00)  | 0.053            | 0.41 (0.28-0.60)  | <b>&lt;0.001</b> |
| 0 < DRI ≤ 1.2                 | 2.54 (0.69-9.31)  | 0.160            | 1.35 (0.31-5.87)  | 0.691            |
| 1.2 < DRI ≤ 1.6               | 0.51 (0.35-0.75)  | <b>0.001</b>     | 0.21 (0.12-0.38)  | <b>&lt;0.001</b> |
| 1.6 < DRI ≤ 2.0               | 1.08 (0.63-1.88)  | 0.773            | 0.61 (0.30-1.25)  | 0.177            |
| 2.0 < DRI                     | 0.89 (0.31-2.60)  | 0.834            | 2.16 (0.69-6.76)  | 0.185            |

Bold type indicates statistically significant differences.

ACLF: Acute-on-chronic liver failure, aHR: Adjusted hazard ratio, CI: Confidence interval, DRI, donor risk index

**SDC, Table 3.** Adjusted hazards of one-year patient death in each DRI category according to eras in non-HCV patients (n=24,516) (ref: Era 1 [2002-2007])

|                                | Era 2 (2008-2013) |                  | Era 3 (2014-2019) |                  |
|--------------------------------|-------------------|------------------|-------------------|------------------|
|                                | aHR (95% CI)      | P                | aHR (95% CI)      | P                |
| <b>Overall ACLF (n=13,203)</b> |                   |                  |                   |                  |
| Overall                        | 0.68 (0.57-0.80)  | <b>&lt;0.001</b> | 0.50 (0.43-0.59)  | <b>&lt;0.001</b> |
| 0 < DRI ≤ 1.2                  | 0.92 (0.54-1.57)  | 0.748            | 0.58 (0.33-1.01)  | 0.053            |
| 1.2 < DRI ≤ 1.6                | 0.66 (0.50-0.86)  | <b>0.002</b>     | 0.44 (0.34-0.57)  | <b>&lt;0.001</b> |
| 1.6 < DRI ≤ 2.0                | 0.77 (0.56-1.07)  | 0.117            | 0.66 (0.48-0.90)  | <b>0.008</b>     |
| 2.0 < DRI                      | 0.59 (0.38-0.93)  | <b>0.021</b>     | 0.57 (0.37-0.88)  | <b>0.011</b>     |
| <b>ACLF-1 and 2 (n=8,610)</b>  |                   |                  |                   |                  |
| Overall                        | 0.63 (0.51-0.79)  | <b>&lt;0.001</b> | 0.52 (0.42-0.64)  | <b>&lt;0.001</b> |
| 0 < DRI ≤ 1.2                  | 0.83 (0.42-1.63)  | 0.585            | 0.66 (0.34-1.30)  | 0.227            |
| 1.2 < DRI ≤ 1.6                | 0.69 (0.48-0.98)  | <b>0.040</b>     | 0.46 (0.32-0.67)  | <b>&lt;0.001</b> |
| 1.6 < DRI ≤ 2.0                | 0.69 (0.45-1.06)  | 0.087            | 0.71 (0.48-1.06)  | 0.095            |
| 2.0 < DRI                      | 0.41 (0.24-0.71)  | <b>0.001</b>     | 0.42 (0.25-0.71)  | <b>0.001</b>     |
| <b>ACLF-3 (n=4,593)</b>        |                   |                  |                   |                  |
| Overall                        | 0.71 (0.55-0.92)  | <b>0.010</b>     | 0.44 (0.34-0.57)  | <b>&lt;0.001</b> |
| 0 < DRI ≤ 1.2                  | 0.97 (0.37-2.51)  | 0.944            | 0.43 (0.16-1.18)  | 0.102            |
| 1.2 < DRI ≤ 1.6                | 0.57 (0.38-0.85)  | <b>0.005</b>     | 0.37 (0.25-0.54)  | <b>&lt;0.001</b> |
| 1.6 < DRI ≤ 2.0                | 0.86 (0.53-1.41)  | 0.559            | 0.56 (0.34-0.92)  | <b>0.021</b>     |
| 2.0 < DRI                      | 1.38 (0.55-3.46)  | 0.490            | 0.90 (0.36-2.27)  | 0.825            |

Bold type indicates statistically significant differences.

ACLF: Acute-on-chronic liver failure, aHR: Adjusted hazard ratio, CI: Confidence interval, DRI, donor risk index
